# Supplementary material for: Allylthioketone Mediated Free Radical Polymerization of Methacrylates
Source: MDPI journal article supplement (doi:10.3390/polym9110608), 2017-11-13
Supplement: s1 [file s1]

## **Supporting information**

### **Allylthioketone Mediated Free Radical Polymerization of Methacrylates**

Feng Zhong<sup>1</sup>, Liang Qiu<sup>2</sup>, Chun-Yan Hong<sup>1\*</sup>, Cai-Yuan Pan<sup>1\*</sup>

<sup>1</sup>CAS Key Laboratory of Soft Matter Chemistry, Department of Polymer Science and Engineering,  
University of Science and Technology of China, Hefei, Anhui, 230026, P. R. China

<sup>2</sup>Institute of Biophysics, Hebei University of Technology, Tianjin 300401, P.R. China

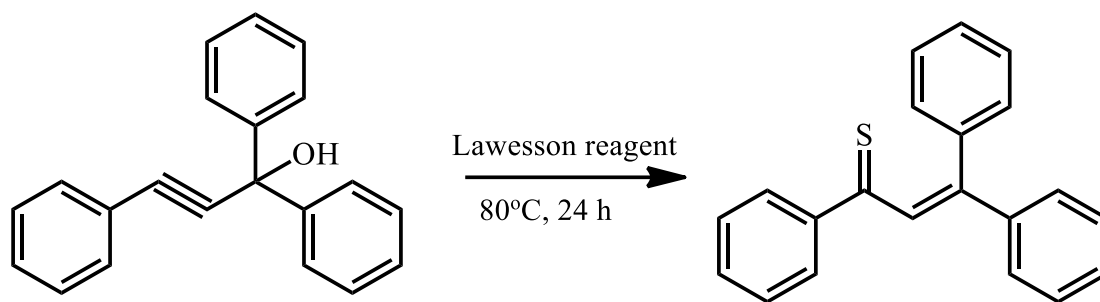

**Scheme S1.** Synthesis of 1,3,3-triphenylprop-2-ene-1-thione

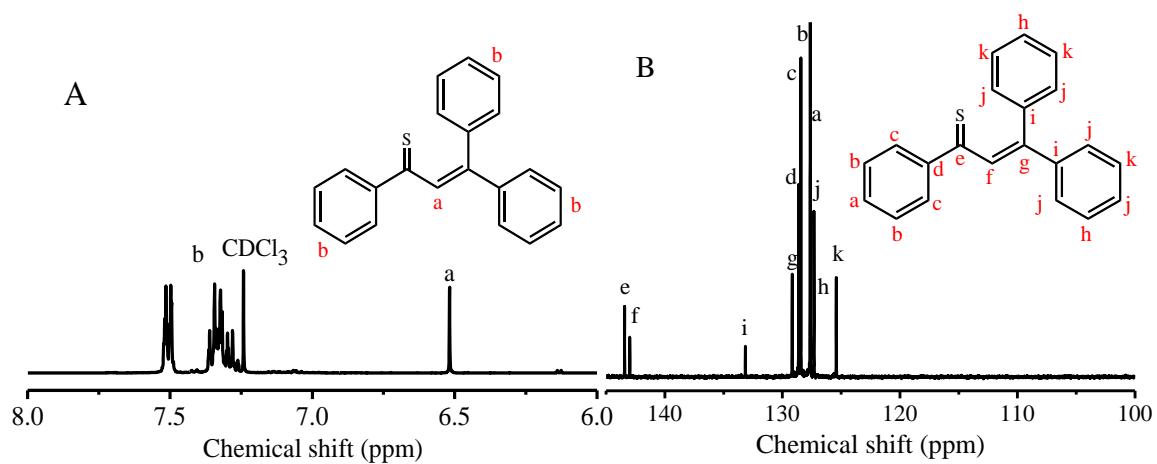

**Figure S1.**  $^1\text{H}$  NMR (A) and  $^{13}\text{C}$  NMR (B) spectra of 1,3,3-triphenylprop-2-ene-1-thione (TPPT)

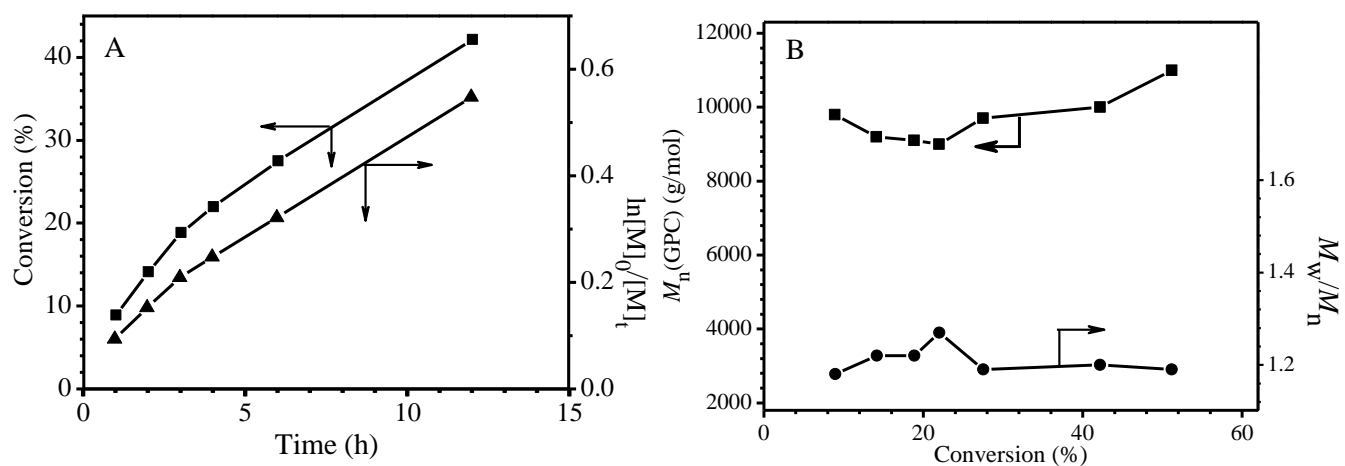

**Figure S2.** Polymerization kinetics (A) and relationship of  $M_n$  (GPC) and  $M_w/M_n$  with the conversion (B) for the polymerization in anisole (50 wt%) with feed molar ratio of MMA/TPPT/AIBME = 100/2/1 at 70°C.

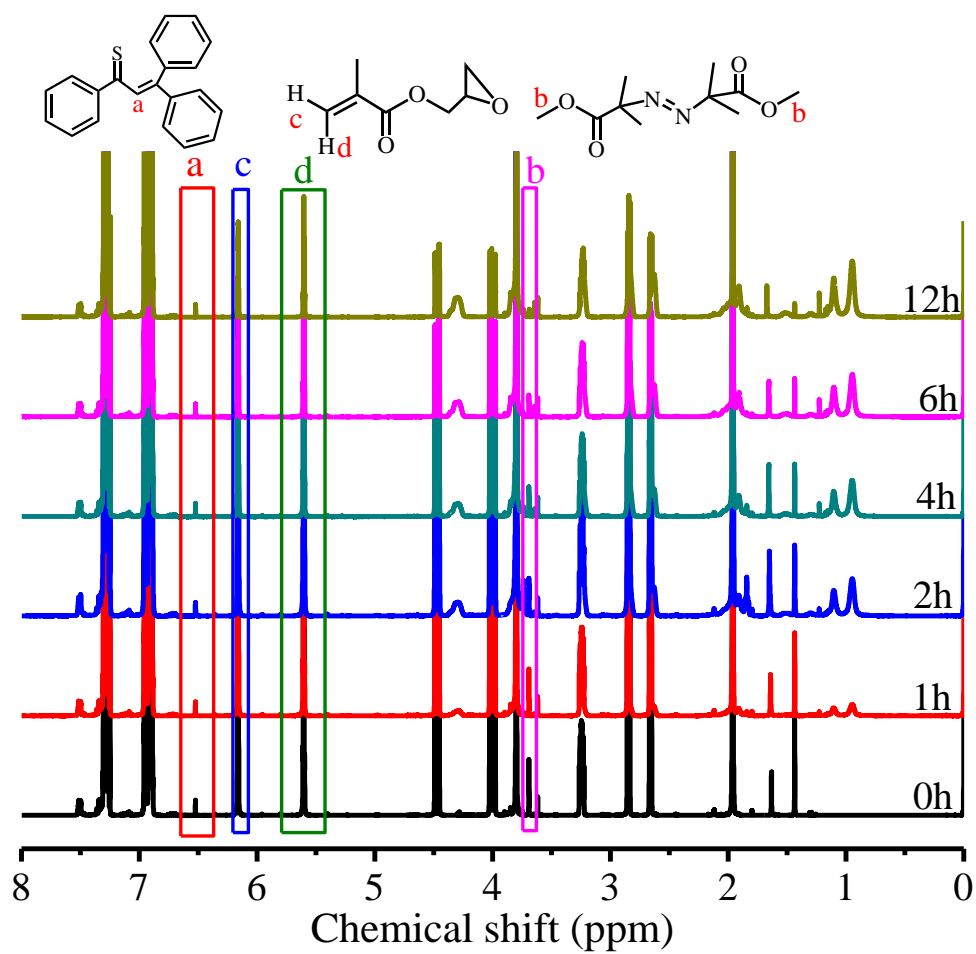

**Figure S3.**  $^1\text{H}$  NMR spectra of the polymerization solutions for the polymerization of GMA with feed molar ratio of GMA/TPPT/AIBN=100/2/1 at  $70^\circ\text{C}$  in anisole (50 wt%) for different reaction time.

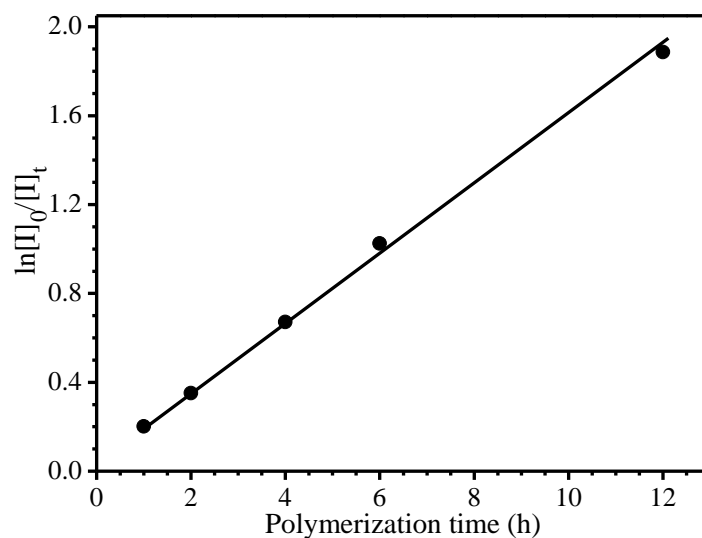

**Figure S4.** Kinetics of AIBME decomposition in the polymerization of GMA with the feed molar ratio of GMA/TPPT/AIBME=100/2/1 in anisole (50 wt%) at 70°C.

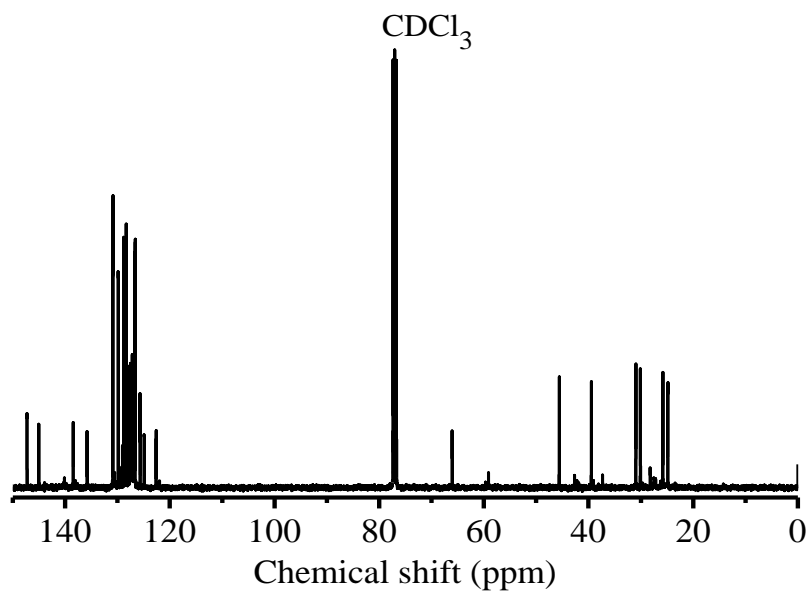

**Figure S5.**  $^{13}\text{C}$  NMR spectrum of 1,3,3-triphenyl-1-isobutylnitilesulfo-3-isobutylnitrileprop-2-ene.

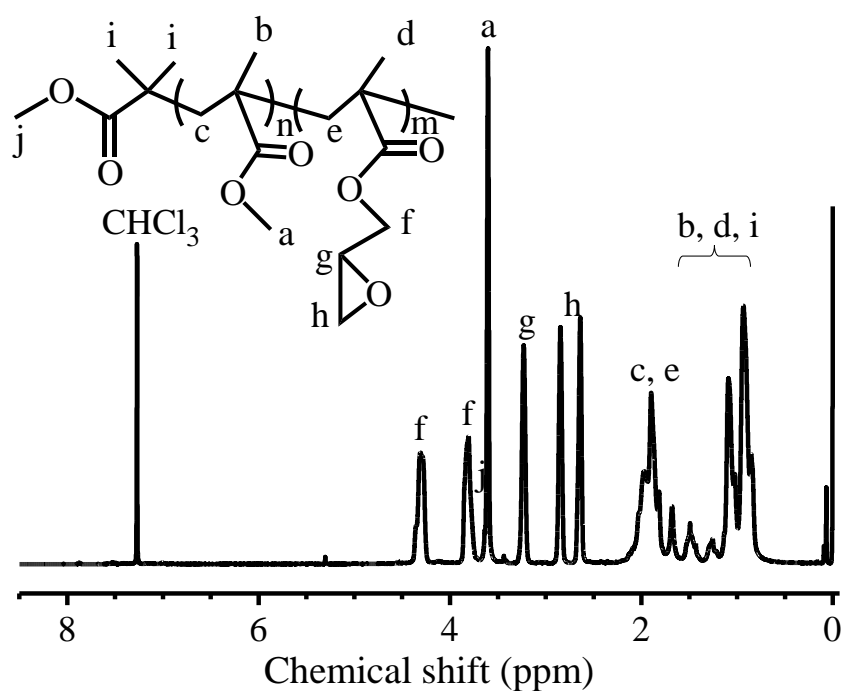

**Figure S6.** <sup>1</sup>H NMR spectrum of the block copolymer, PMMA-*b*-PGMA obtained from the extension polymerization of PMMA ( $M_n=6400$  and  $M_w/M_n=1.23$ ) by directly adding the GMA (double moles of MMA) into the PMMA solution, which was obtained by the polymerization of MMA with feed molar ratio of MMA/TPPT/AIBME=50/2/1 in anisole (50 wt%) at 70°C for 24 h, and then continuous polymerization in anisole (30 wt%) at 70°C for 12 h.

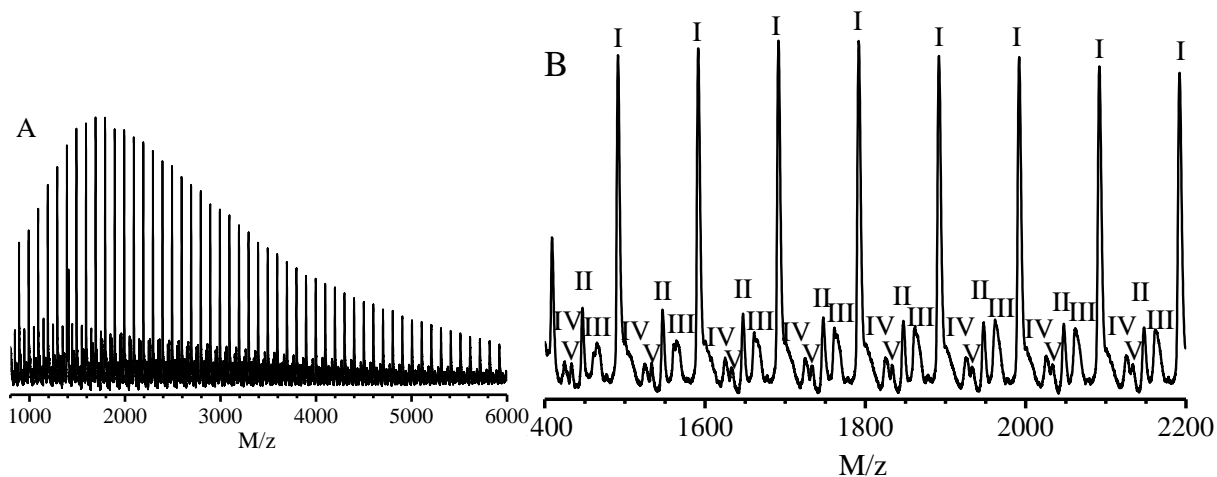

**Figure S7.** MALDI-TOF spectrum (A) and enlarged spectrum (B) of the poly(methyl methacrylate) obtained by radical polymerization with feed molar ratio of MMA/TPPT/AIBN=20/2/1 in anisole (concentration = 20%) at 70°C for 24h.

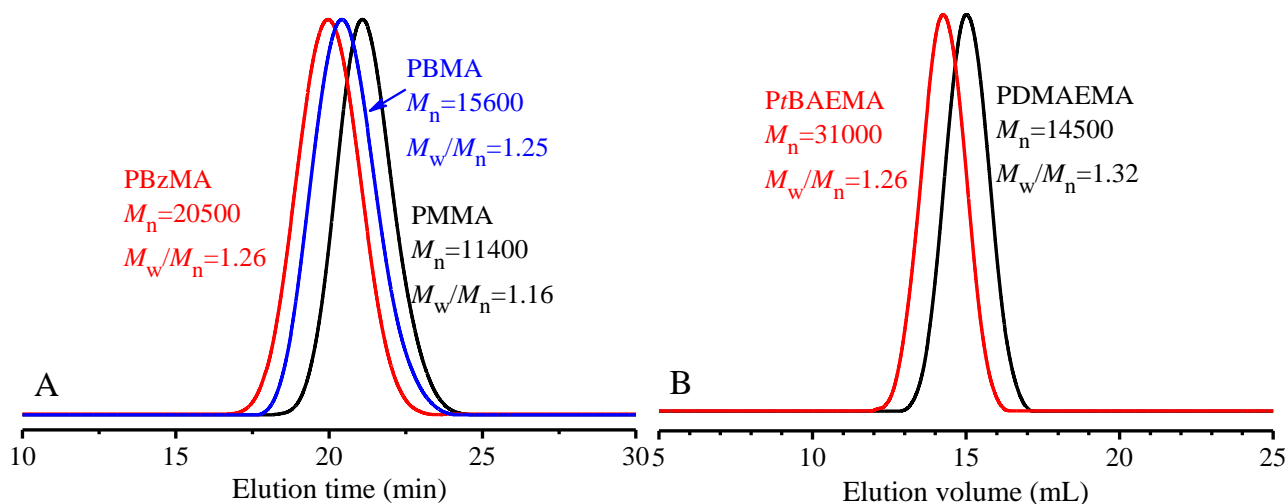

**Figure S8.** GPC traces of the PMMA, PBMA, PBzMA, PDMAEMA and PtBAEMA prepared by the polymerization with feed molar ratio of M/TPPT/AIBME=100/2/1 in anisole (50 wt%) at 70°C for 12 h. For PMMA, PBMA and PBzMA, THF was used as eluent, for PDMAEMA and PtBAEMA, DMF was used as eluent.

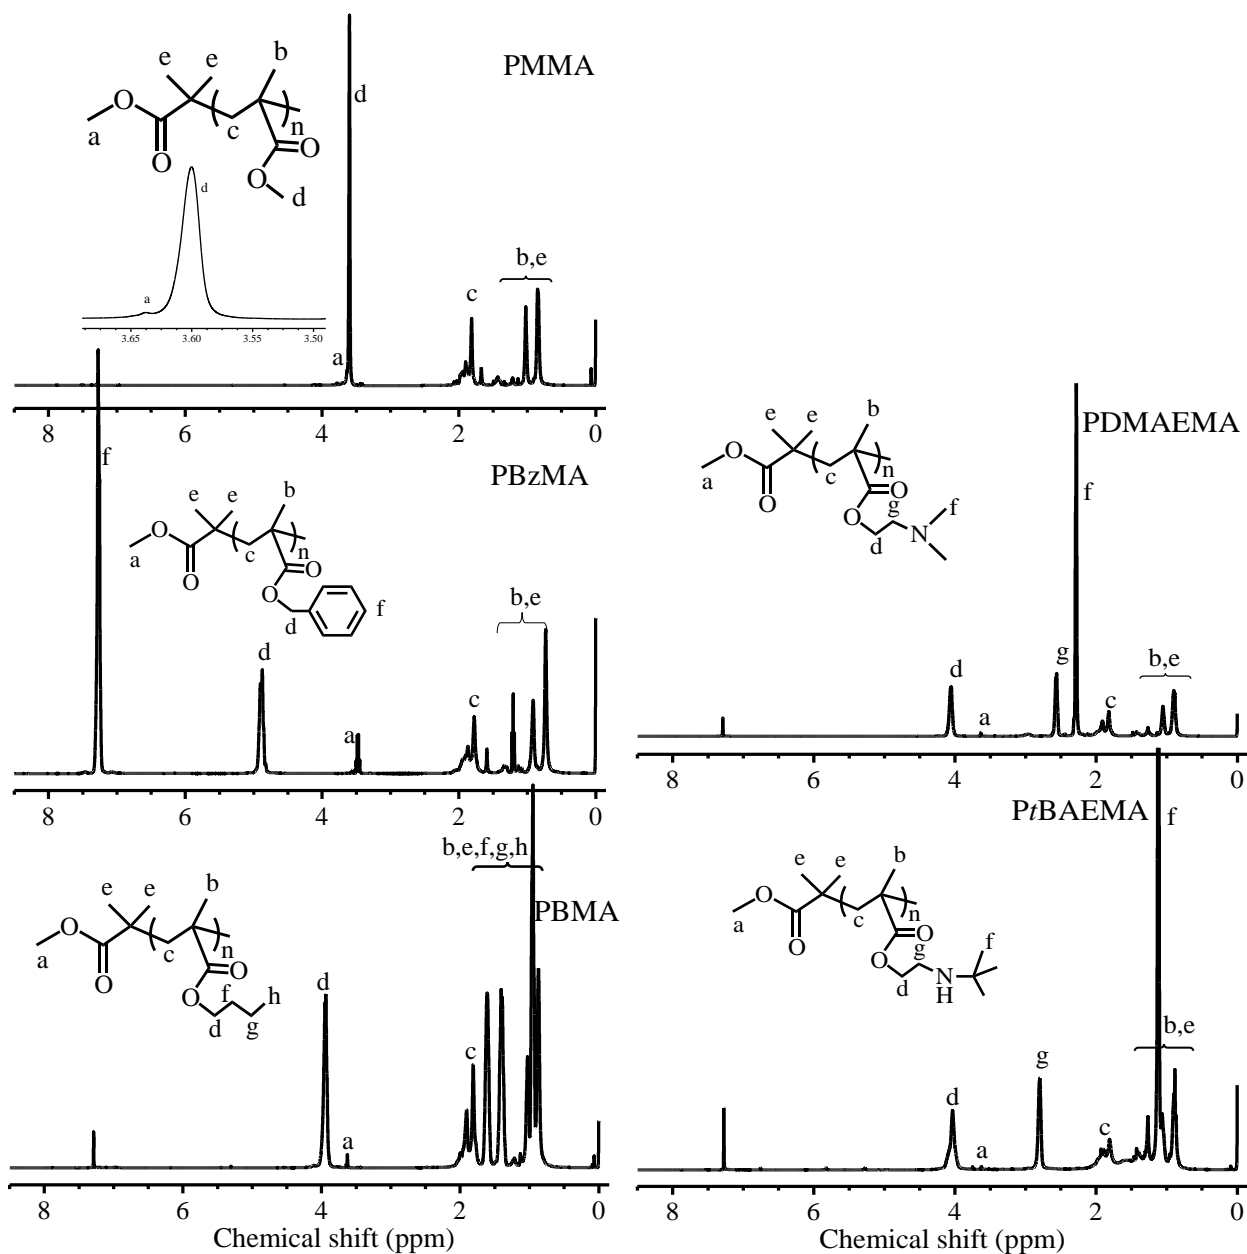

**Figure S9.**  $^1\text{H}$  NMR spectra of PMMA, PBzMA, PBMA, PDMAEMA and PtBAEMA prepared by the polymerizations with feed molar ratio of M/TPPT/AIBME = 100/2/1 in anisole (50 wt%) at 70°C for 12 h.
